# Supplementary material for: A pair of commissural command neurons induces Drosophila wing grooming
Source: PubMed Central journal article supplement — iScience. 2022 Feb 3;25(2):103792. doi: 10.1016/j.isci.2022.103792 (PMC8859526; doi:10.1016/j.isci.2022.103792), 2022-02-03
Supplement: mmc1.pdf [file mmc1.pdf]

iScience, Volume 25

**Supplemental information**

**A pair of commissural command neurons  
induces *Drosophila* wing grooming**

**Neil Zhang and Julie H. Simpson**

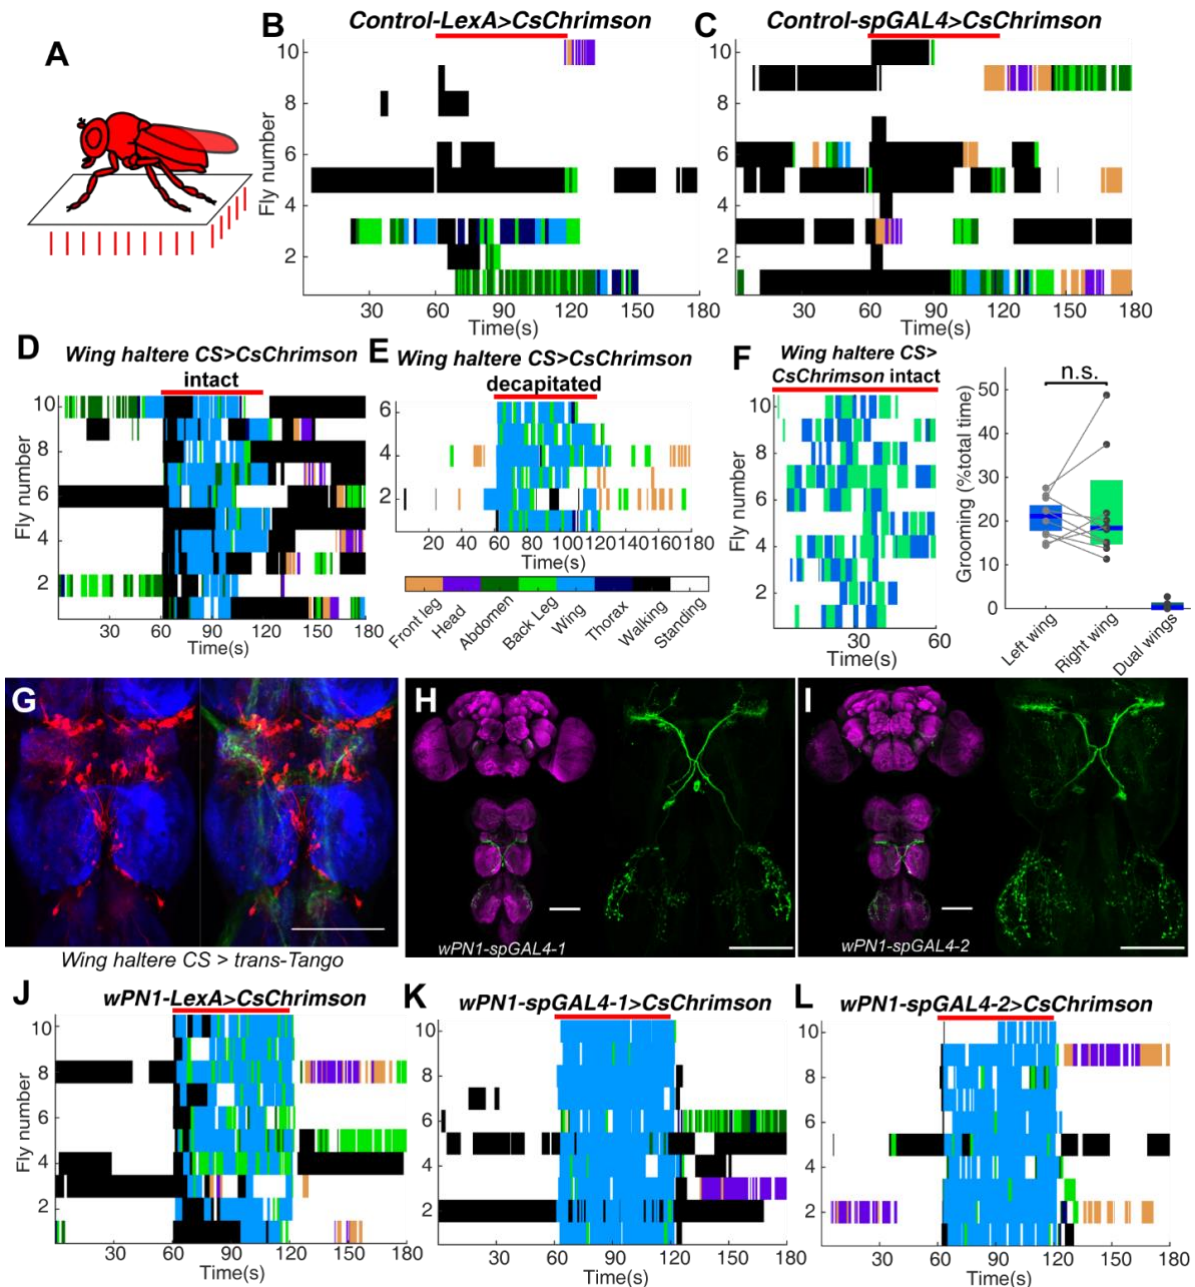

**Figure S1. Wing grooming can be induced by optogenetic activation of wing campaniform sensilla and wPN1. Related to Fig. 1.**

(A) Experiment setup for optogenetic activation. Free-moving flies were activated by red light delivered from below. (B-E) Grooming response induced by optogenetic activation of control lines (B, C) and the driver line targeting wing campaniform sensilla (D, E). 60s-optogenetic stimulation is indicated by a red line. (F) Quantification of different types of wing grooming during wing campaniform sensilla activation; note that the same videos were used in D. (G) Expression of *trans-Tango* in campaniform sensilla reveals candidate post-synaptic neurons (red). Green: anti-GFP. Red: anti-HA. Blue: anti-Bruchpilot. Scale bars, 100 $\mu$ m. (H, I) Expression pattern of *wPN1-spGAL4-1* (H) and *wPN1-spGAL4-2* (I) in CNS. (J-L) Grooming response induced by optogenetic activation of driver lines targeting wPN1.

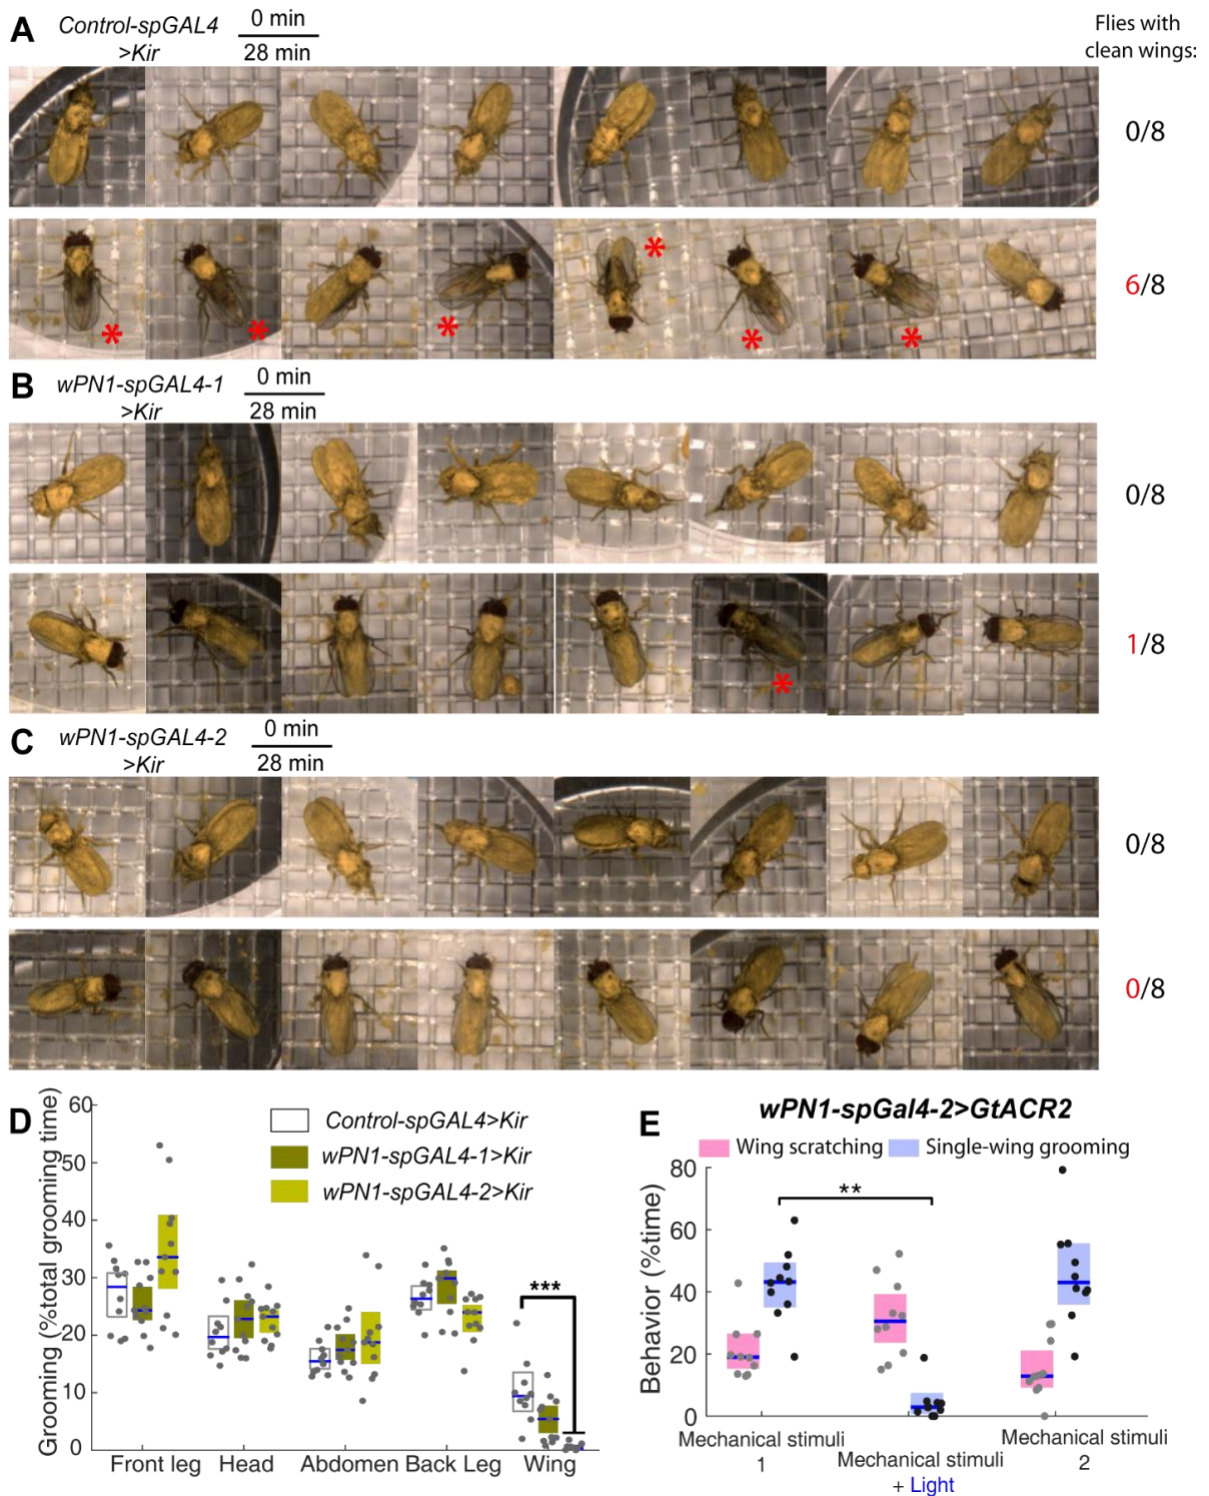

**Figure S2. wPN1 is necessary for wing grooming. Related to Fig. 2.**

(A-C) Video screenshots showing the dust distribution in control flies (A) and flies with wPN1 inhibition (B, C) at different time points. Flies with clean wings are labeled by red asterisks. (D) Percent of grooming time each behavior performed by dusted control flies or flies with wPN1 inhibited by Kir. (E) Quantification of different wing cleaning behaviors induced by mechanical stimuli with wPN1 inhibition.

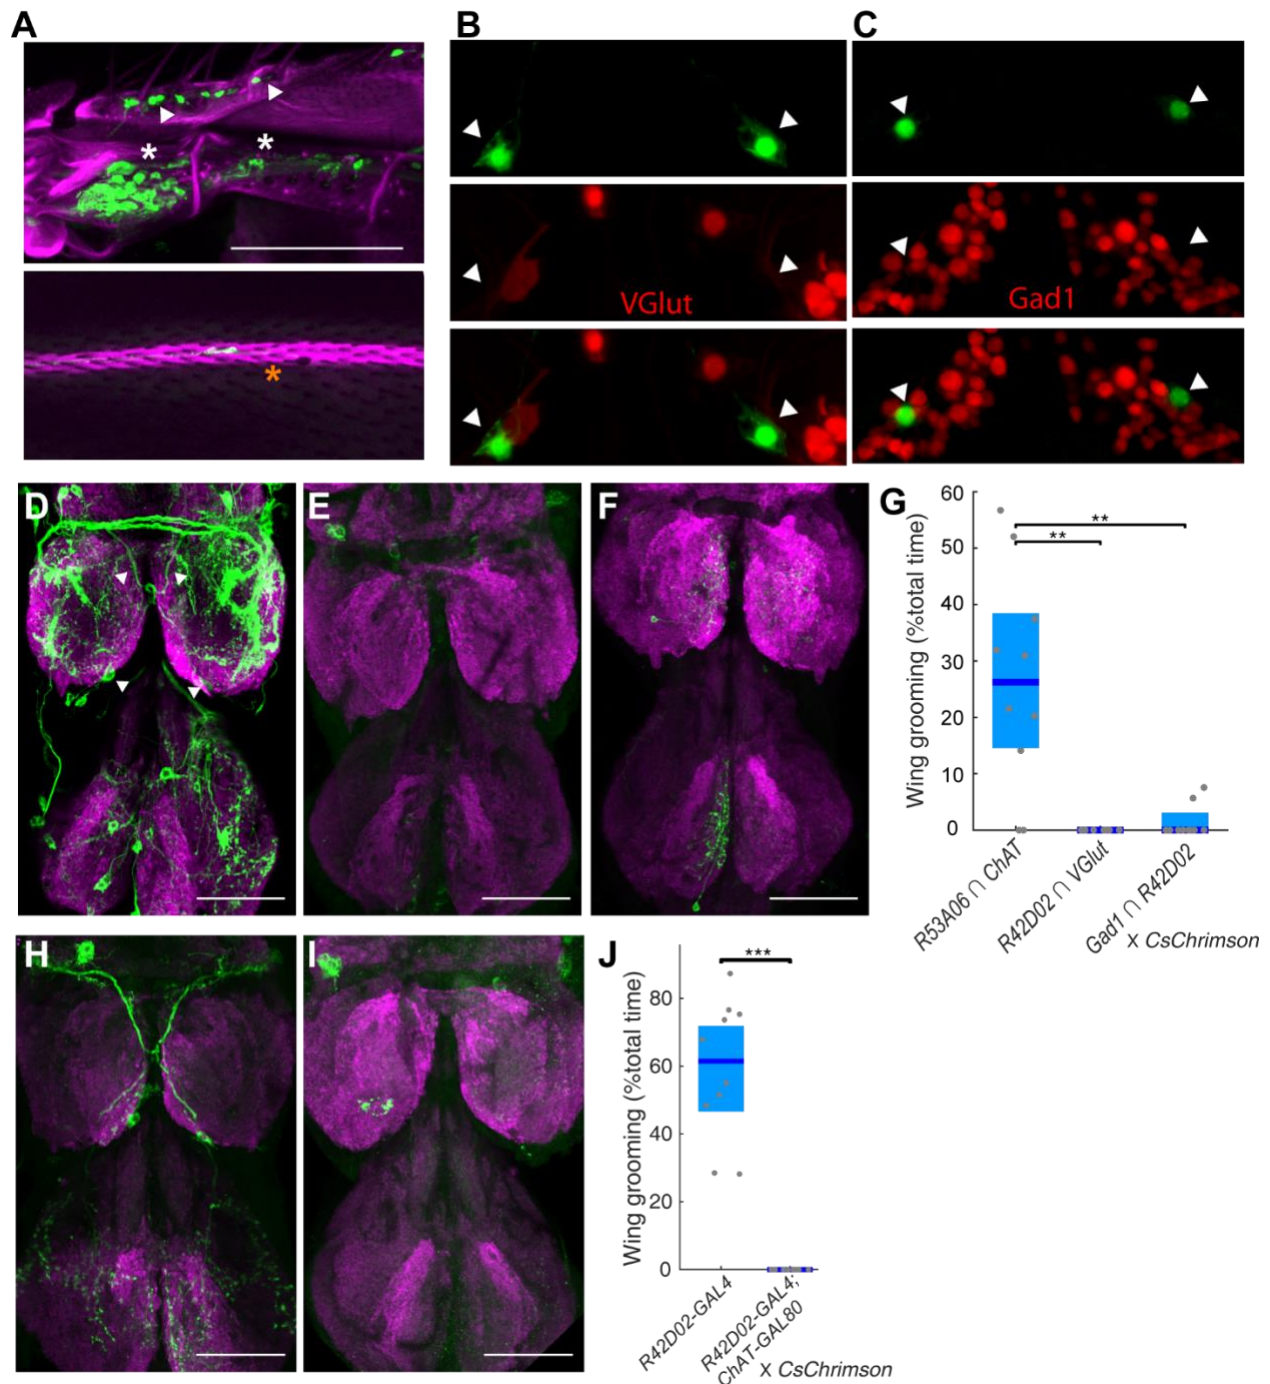

**Figure S3. Wing mechanosensory neurons and wPN1 are cholinergic. Related to Fig. 3.**

(A) Wing bristles (arrow heads) and campaniform sensilla (asterisks) neurons are labelled by *ChAT-LexA*. Scale bars, 100 $\mu$ m. (B, C) Double labeling of wPN1 (*R42D02-GAL4*, green) with glutaminergic neurons (*VGlut-LexA*, B) and GABAergic neurons (*Gad1-LexA*, C). (D-F) Intersections between wPN1 driver lines and driver lines for cholinergic (D), glutaminergic (E) or GABAergic (F) neurons. Genotype: *R53A06-AD n ChAT-DBD>CsChrimson* (D), *R42D02-GAL4 > stop-CsChrimson; VGlut-Flp* (E), *Gad1-AD n R42D02-DBD>CsChrimson* (F). Scale bars, 100 $\mu$ m. (G) Box plot showing wing grooming (%total time) for *R53A06 n ChAT*, *R42D02 n VGlut*, and *Gad1 n R42D02 x CsChrimson*. (H, I) Intersections between wPN1 driver lines and driver lines for cholinergic (H) or glutaminergic (I) neurons. Genotype: *R53A06-AD n ChAT-DBD>CsChrimson* (H), *R42D02-GAL4 > stop-CsChrimson; VGlut-Flp* (I). Scale bars, 100 $\mu$ m. (J) Box plot showing wing grooming (%total time) for *R42D02-GAL4*, *R42D02-GAL4; ChAT-GAL80*, and *R42D02-GAL4; Gad1-GAL80 x CsChrimson*.

bars, 100 $\mu$ m. (G) Percent of time flies spend in wing grooming during one-minute photoactivation of corresponding intersection lines. (H, I) The expression pattern of the *R42D02-GAL4* driver line alone (H) or with *Cha-GAL80* inhibitor (I). (J) Percent of time flies spend in wing grooming during one-minute photoactivation of corresponding driver lines.

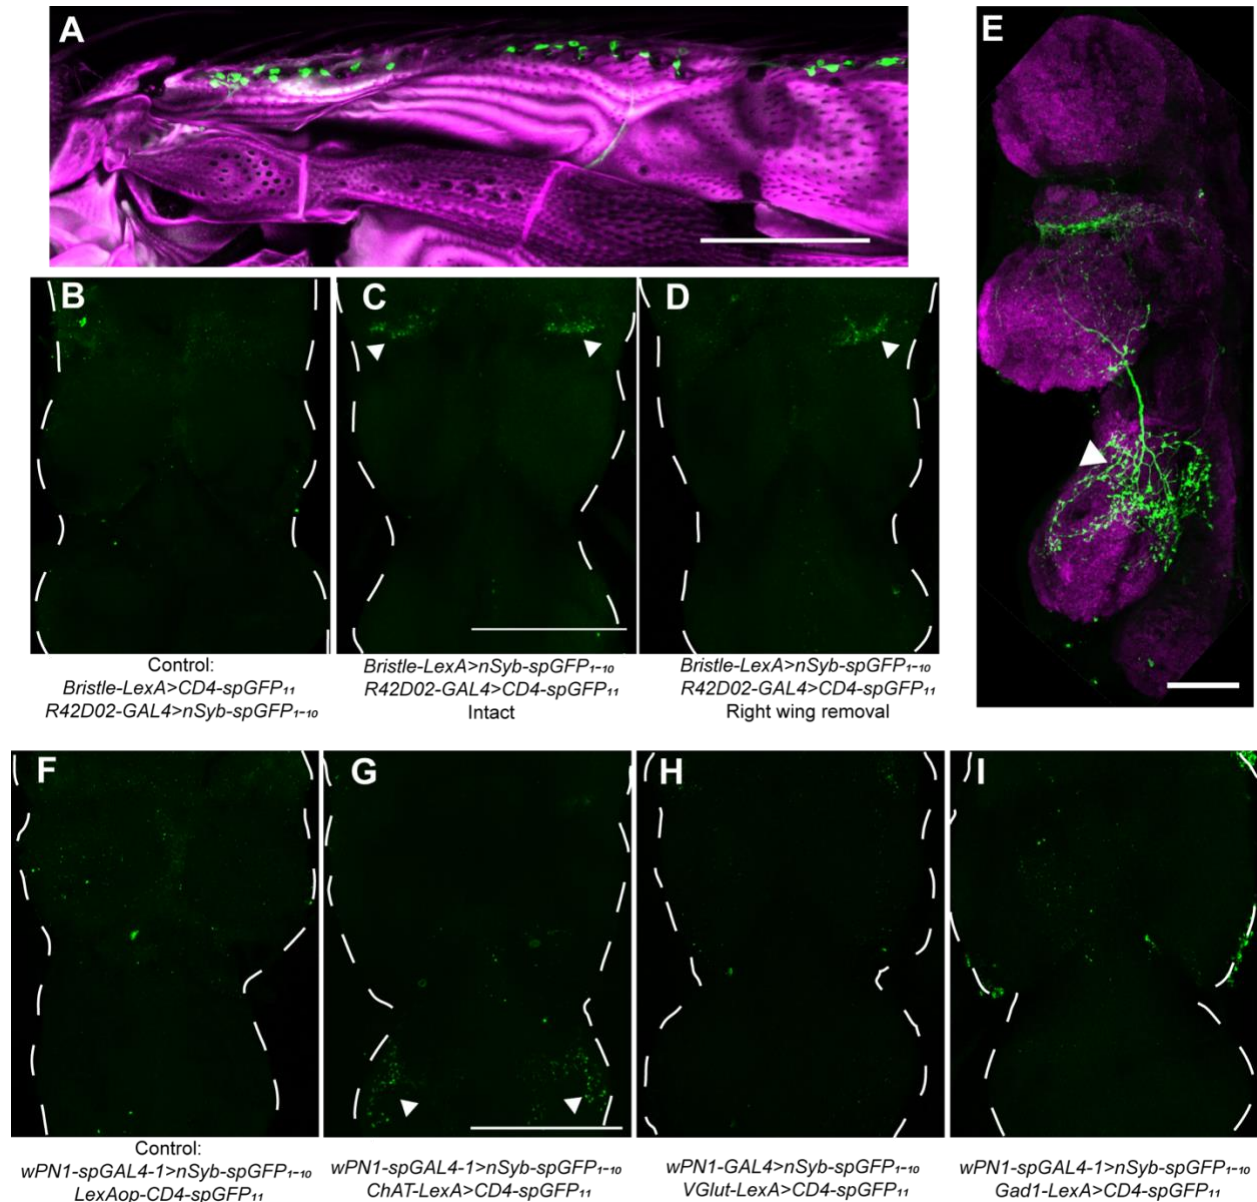

**Figure S4. Candidate pre-synaptic and post-synaptic neurons of wPN1. Related to Fig. 3 and 4.**

(A) Expression pattern of *Bristle-Gal4* in wing. Scale bars, 100 $\mu$ m. (B) Lack of GRASP signal in control samples between wPN1 axons and wing bristle neurons. (C, D) Synaptic GRASP reconstituted GFP signal (green, arrowhead) was observed between wing bristle neuron axons and wPN1 interneurons. (E) Side-view of wPN1, arrowhead indicates the potential connecting areas with downstream commissures. (F) Lack of GRASP signal in control samples with only one GFP fragment. (G) Synaptic GRASP signal (green, arrowhead) between wPN1 axons and cholinergic neurons. (H, I) No GRASP signal is observed between wPN1 and glutaminergic (H) or GABAergic (I) neurons.
